# Supplementary material for: Feline-Ality™ in Real Life: A Program Evaluation
Source: MDPI journal article supplement (doi:10.3390/ani13172752), 2023-08-29
Supplement: s1 [file s1]

| Item                                   | Observer instructions                                                                                                                                                                                                                                                                                                                                                                                                                                                                                                                                                                                                                                                                                                                                                                                                                                                                                                                                                                                                                                                                                                    |                                 | Listed possible behaviors                                                                                   | Scores |
|----------------------------------------|--------------------------------------------------------------------------------------------------------------------------------------------------------------------------------------------------------------------------------------------------------------------------------------------------------------------------------------------------------------------------------------------------------------------------------------------------------------------------------------------------------------------------------------------------------------------------------------------------------------------------------------------------------------------------------------------------------------------------------------------------------------------------------------------------------------------------------------------------------------------------------------------------------------------------------------------------------------------------------------------------------------------------------------------------------------------------------------------------------------------------|---------------------------------|-------------------------------------------------------------------------------------------------------------|--------|
| 1. Body Posture                        | Quietly approach the cat's cage door and while standing in front of the cat's cage, take a quick mental snapshot of the cat's body posture. Choose one of the following Reponses.                                                                                                                                                                                                                                                                                                                                                                                                                                                                                                                                                                                                                                                                                                                                                                                                                                                                                                                                        |                                 | Soft and relaxed                                                                                            | 1      |
|                                        |                                                                                                                                                                                                                                                                                                                                                                                                                                                                                                                                                                                                                                                                                                                                                                                                                                                                                                                                                                                                                                                                                                                          |                                 | Tense body with twitching tail                                                                              | 1      |
|                                        |                                                                                                                                                                                                                                                                                                                                                                                                                                                                                                                                                                                                                                                                                                                                                                                                                                                                                                                                                                                                                                                                                                                          |                                 | Flattened body with dilated pupils                                                                          | -1     |
| 2. Greeting Approach                   | Immediately after taking a mental snapshot of the cat's body posture during item #1, begin to speak to the cat in a soft, normal tone of voice. Observe the cat's response to your presence through the closed cage door. Choose one of the following responses.                                                                                                                                                                                                                                                                                                                                                                                                                                                                                                                                                                                                                                                                                                                                                                                                                                                         |                                 | At front of cage, soliciting attention by rubbing, chirping, etc.                                           | 3      |
|                                        |                                                                                                                                                                                                                                                                                                                                                                                                                                                                                                                                                                                                                                                                                                                                                                                                                                                                                                                                                                                                                                                                                                                          |                                 | Comes to the front of the cage after you encourage                                                          | 2      |
|                                        |                                                                                                                                                                                                                                                                                                                                                                                                                                                                                                                                                                                                                                                                                                                                                                                                                                                                                                                                                                                                                                                                                                                          |                                 | Does not approach but meows, chirps, or blinks (circle all that apply)                                      | 1      |
|                                        |                                                                                                                                                                                                                                                                                                                                                                                                                                                                                                                                                                                                                                                                                                                                                                                                                                                                                                                                                                                                                                                                                                                          |                                 | Does not approach                                                                                           | 0      |
|                                        |                                                                                                                                                                                                                                                                                                                                                                                                                                                                                                                                                                                                                                                                                                                                                                                                                                                                                                                                                                                                                                                                                                                          |                                 | Attempts to hide                                                                                            | -1     |
|                                        |                                                                                                                                                                                                                                                                                                                                                                                                                                                                                                                                                                                                                                                                                                                                                                                                                                                                                                                                                                                                                                                                                                                          |                                 | Hisses or growls                                                                                            | -2     |
|                                        |                                                                                                                                                                                                                                                                                                                                                                                                                                                                                                                                                                                                                                                                                                                                                                                                                                                                                                                                                                                                                                                                                                                          |                                 | Charges                                                                                                     | -3     |
| 3. Cage Condition                      | While quietly standing in front of the cat's cage, observe and note its condition. Choose one of the following.                                                                                                                                                                                                                                                                                                                                                                                                                                                                                                                                                                                                                                                                                                                                                                                                                                                                                                                                                                                                          |                                 | Bedding/cage paper moved, cat hiding under                                                                  | -1     |
|                                        |                                                                                                                                                                                                                                                                                                                                                                                                                                                                                                                                                                                                                                                                                                                                                                                                                                                                                                                                                                                                                                                                                                                          |                                 | Cage rearranged, cat on top or not hiding                                                                   | 1      |
|                                        |                                                                                                                                                                                                                                                                                                                                                                                                                                                                                                                                                                                                                                                                                                                                                                                                                                                                                                                                                                                                                                                                                                                          |                                 | No change                                                                                                   | 0      |
|                                        |                                                                                                                                                                                                                                                                                                                                                                                                                                                                                                                                                                                                                                                                                                                                                                                                                                                                                                                                                                                                                                                                                                                          |                                 | Other, please describe                                                                                      | 0      |
| 4. Social Response when door is opened | After completing items 1 through 3, calmly and slowly open the cage door while watching the cat. This should be done without talking. Observe the cat at the moment the door is initially opened. Choose one of the following responses.                                                                                                                                                                                                                                                                                                                                                                                                                                                                                                                                                                                                                                                                                                                                                                                                                                                                                 |                                 | Remains relaxed and soft, approaches me                                                                     | 1      |
|                                        |                                                                                                                                                                                                                                                                                                                                                                                                                                                                                                                                                                                                                                                                                                                                                                                                                                                                                                                                                                                                                                                                                                                          |                                 | Remains relaxed and soft, does not approach                                                                 | 0      |
|                                        |                                                                                                                                                                                                                                                                                                                                                                                                                                                                                                                                                                                                                                                                                                                                                                                                                                                                                                                                                                                                                                                                                                                          |                                 | Becomes stiff with tight tail flicks and standing                                                           | 1      |
|                                        |                                                                                                                                                                                                                                                                                                                                                                                                                                                                                                                                                                                                                                                                                                                                                                                                                                                                                                                                                                                                                                                                                                                          |                                 | Crouches, body stiff                                                                                        | -1     |
| 5a-b. Introduction to a Novel Room     | Take the cat out of the cage and place him into a plastic crate (cleaned and allowed to air) for transport to the Novel Room. Ideally the cat should be loaded into the crate from above (turn crate so door is facing the ceiling). Throughout this item, you will be recording the amount of time the cat is either interacting or not interacting with you. In order to obtain an accurate assessment of time spent in each activity, use two stopwatches-one to keep the total time (start when you open crate door, end at five minutes), and the second to keep track of time interacting with you. Click on the second stopwatch whenever an interaction begins and click it off once the interaction ends. IMPORTANT: OTHER THAN EYE CONTACT, DO NOT INITIATE, ENGAGE WITH OR RESPOND TO THE CAT. INTERACTION INCLUDES EYE CONTACT OR OTHER BEHAVIOR EVEN WHEN THE CAT IS IN THE CARRIER. Interactive behaviors include meows, chirps, looks, blinks, rubbing against you, touching you, and being in your lap. Be sure to include those behaviors made while inside the carrier after the door has been opened. | 5a                              | (5a) Exits carrier in 25 seconds or less with a tall body posture                                           | 1      |
|                                        |                                                                                                                                                                                                                                                                                                                                                                                                                                                                                                                                                                                                                                                                                                                                                                                                                                                                                                                                                                                                                                                                                                                          |                                 | (5a) Exits the carrier in 25 seconds or less with crouched body posture                                     | 0.5    |
|                                        |                                                                                                                                                                                                                                                                                                                                                                                                                                                                                                                                                                                                                                                                                                                                                                                                                                                                                                                                                                                                                                                                                                                          |                                 | (5a) Exits the carrier within 25 seconds and quickly scoots to hiding place, keeping body low to the ground | -0.5   |
|                                        |                                                                                                                                                                                                                                                                                                                                                                                                                                                                                                                                                                                                                                                                                                                                                                                                                                                                                                                                                                                                                                                                                                                          | 5a - choose one (if applicable) | Investigates room while standing tall                                                                       | 1      |
|                                        |                                                                                                                                                                                                                                                                                                                                                                                                                                                                                                                                                                                                                                                                                                                                                                                                                                                                                                                                                                                                                                                                                                                          |                                 | Investigates room in a low body posture                                                                     | 0.5    |
|                                        |                                                                                                                                                                                                                                                                                                                                                                                                                                                                                                                                                                                                                                                                                                                                                                                                                                                                                                                                                                                                                                                                                                                          | 5b                              | Races out of carrier to one spot in the room and stays there                                                | -0.5   |
|                                        |                                                                                                                                                                                                                                                                                                                                                                                                                                                                                                                                                                                                                                                                                                                                                                                                                                                                                                                                                                                                                                                                                                                          |                                 | (5b) Time spent interacting with evaluator (as determined by second stopwatch)                              | __sec  |
|                                        |                                                                                                                                                                                                                                                                                                                                                                                                                                                                                                                                                                                                                                                                                                                                                                                                                                                                                                                                                                                                                                                                                                                          | 5b - choose one                 | (5b) Time not spent interacting with the evaluator                                                          | __sec  |
|                                        |                                                                                                                                                                                                                                                                                                                                                                                                                                                                                                                                                                                                                                                                                                                                                                                                                                                                                                                                                                                                                                                                                                                          |                                 | Interacts for more than 60 seconds                                                                          | 1 1/2  |
|                                        |                                                                                                                                                                                                                                                                                                                                                                                                                                                                                                                                                                                                                                                                                                                                                                                                                                                                                                                                                                                                                                                                                                                          |                                 | Interacts for 30-60 seconds                                                                                 | 1      |
| 6. Call and Approach                   | Crouch down on the opposite side of the room from the cat and about five to six feet away, start the stopwatch, and call the cat several times. Extend one hand, closed in a fist, toward him. Stop the stopwatch when the cat approaches and makes contact with your hand or body. Allow the cat up to 30 seconds to approach. Be sure to talk softly and encourage forward with voice. Check all behaviors that occur.                                                                                                                                                                                                                                                                                                                                                                                                                                                                                                                                                                                                                                                                                                 |                                 | Interacts for less than 30 seconds                                                                          | 0      |
|                                        |                                                                                                                                                                                                                                                                                                                                                                                                                                                                                                                                                                                                                                                                                                                                                                                                                                                                                                                                                                                                                                                                                                                          |                                 | Makes eye contact                                                                                           | 1      |
|                                        |                                                                                                                                                                                                                                                                                                                                                                                                                                                                                                                                                                                                                                                                                                                                                                                                                                                                                                                                                                                                                                                                                                                          |                                 | Does not make eye contact                                                                                   | -!     |
|                                        |                                                                                                                                                                                                                                                                                                                                                                                                                                                                                                                                                                                                                                                                                                                                                                                                                                                                                                                                                                                                                                                                                                                          |                                 | Approaches                                                                                                  | 3      |
|                                        |                                                                                                                                                                                                                                                                                                                                                                                                                                                                                                                                                                                                                                                                                                                                                                                                                                                                                                                                                                                                                                                                                                                          |                                 | Sniffs or head butts                                                                                        | 3      |
|                                        |                                                                                                                                                                                                                                                                                                                                                                                                                                                                                                                                                                                                                                                                                                                                                                                                                                                                                                                                                                                                                                                                                                                          |                                 | Rolls on back or rolls over                                                                                 | 2      |
|                                        |                                                                                                                                                                                                                                                                                                                                                                                                                                                                                                                                                                                                                                                                                                                                                                                                                                                                                                                                                                                                                                                                                                                          |                                 | Meows, purrs and/or chirps (circle all that apply)                                                          | 1      |
|                                        |                                                                                                                                                                                                                                                                                                                                                                                                                                                                                                                                                                                                                                                                                                                                                                                                                                                                                                                                                                                                                                                                                                                          |                                 | Watches with no approach                                                                                    | 0      |
|                                        |                                                                                                                                                                                                                                                                                                                                                                                                                                                                                                                                                                                                                                                                                                                                                                                                                                                                                                                                                                                                                                                                                                                          |                                 | Retreats                                                                                                    | -1     |
|                                        |                                                                                                                                                                                                                                                                                                                                                                                                                                                                                                                                                                                                                                                                                                                                                                                                                                                                                                                                                                                                                                                                                                                          |                                 | Hisses and/or growl                                                                                         | -2     |
|                                        |                                                                                                                                                                                                                                                                                                                                                                                                                                                                                                                                                                                                                                                                                                                                                                                                                                                                                                                                                                                                                                                                                                                          |                                 | Sniffs or head butts                                                                                        | 3      |
|                                        |                                                                                                                                                                                                                                                                                                                                                                                                                                                                                                                                                                                                                                                                                                                                                                                                                                                                                                                                                                                                                                                                                                                          |                                 | licks or rubs on hand                                                                                       | 3      |

|                 |                                                                                                                                                                                                                                                                                                                                                                                                                                                                       |                                                                      |    |
|-----------------|-----------------------------------------------------------------------------------------------------------------------------------------------------------------------------------------------------------------------------------------------------------------------------------------------------------------------------------------------------------------------------------------------------------------------------------------------------------------------|----------------------------------------------------------------------|----|
| 7. Open Hand    | While still crouching, extend an open hand to the cat. Your hand should be lower than the cat's head. If the cat did not approach you in item #6, walk toward and crouch next to the cat. Check all behaviors that occur.                                                                                                                                                                                                                                             | Rolls on back or rolls over                                          | 2  |
|                 |                                                                                                                                                                                                                                                                                                                                                                                                                                                                       | Meows, purrs and/or chirps (circle all that apply)                   | 2  |
|                 |                                                                                                                                                                                                                                                                                                                                                                                                                                                                       | Retreats/defensive position                                          | -2 |
|                 |                                                                                                                                                                                                                                                                                                                                                                                                                                                                       | Hisses and/or growls                                                 | -2 |
|                 |                                                                                                                                                                                                                                                                                                                                                                                                                                                                       | Swats/attempts to swat hand                                          | -2 |
|                 |                                                                                                                                                                                                                                                                                                                                                                                                                                                                       | Bites/attempts to bite hand                                          | -3 |
| 8. Stroking     | While talking to the cat, use your open hand, slightly cupped, to stroke the cat in long strokes along the head, back and sides. Continue for 4 to 5 long slow strokes if possible. Check all behaviors that occur.                                                                                                                                                                                                                                                   | Rubs against legs or hand                                            | 3  |
|                 |                                                                                                                                                                                                                                                                                                                                                                                                                                                                       | Head butts                                                           | 3  |
|                 |                                                                                                                                                                                                                                                                                                                                                                                                                                                                       | Circles you attentively                                              | 2  |
|                 |                                                                                                                                                                                                                                                                                                                                                                                                                                                                       | Meows, purrs and/or chirps (circle all that apply)                   | 2  |
|                 |                                                                                                                                                                                                                                                                                                                                                                                                                                                                       | Rolls on back or rolls over                                          | 2  |
|                 |                                                                                                                                                                                                                                                                                                                                                                                                                                                                       | Shows initial fear but then relaxes                                  | 0  |
|                 |                                                                                                                                                                                                                                                                                                                                                                                                                                                                       | Retreats/defensive position                                          | -1 |
|                 |                                                                                                                                                                                                                                                                                                                                                                                                                                                                       | Hisses and/or growls                                                 | -2 |
|                 |                                                                                                                                                                                                                                                                                                                                                                                                                                                                       | Swats or attempts to swat hand                                       | -2 |
|                 |                                                                                                                                                                                                                                                                                                                                                                                                                                                                       | Bites or attempts to bite hand                                       | -3 |
| 9. Play         | Beginning a couple of feet away from the cat, slowly move a piece of string/yarn along the floor to initiate play. Observe that cat's reaction. Then try to engage the cat in play with two other toys from the following list (for a total of three different toys): Ball, Toy Mouse, Cat Charmer, and Feather Wand. Do not use catnip toys during the Feline-ality Assessment. Check all behaviors that occur. Circle the toy preferences on the score sheet so the | Watches toy intently                                                 | 3  |
|                 |                                                                                                                                                                                                                                                                                                                                                                                                                                                                       | Chases toy                                                           | 3  |
|                 |                                                                                                                                                                                                                                                                                                                                                                                                                                                                       | Comes back for stroking                                              | 2  |
|                 |                                                                                                                                                                                                                                                                                                                                                                                                                                                                       | Ignores toys                                                         | 0  |
|                 |                                                                                                                                                                                                                                                                                                                                                                                                                                                                       | Attends to something else                                            | -1 |
|                 |                                                                                                                                                                                                                                                                                                                                                                                                                                                                       | Avoids eye contact                                                   | -1 |
| 10. Hug         | Call the cat again until he approaches, or approach him slowly yourself. Begin to stroke the cat again and if he is calm, gently pick him up and cradle him against your chest, his body sideways to your chest for a full two seconds. Check all behaviors that occur.                                                                                                                                                                                               | Is relaxed                                                           | 3  |
|                 |                                                                                                                                                                                                                                                                                                                                                                                                                                                                       | Extends paw to evaluator's neck or shoulder in an affiliative manner | 3  |
|                 |                                                                                                                                                                                                                                                                                                                                                                                                                                                                       | Meows, purrs and/or chirps (circle all that apply)                   | 2  |
|                 |                                                                                                                                                                                                                                                                                                                                                                                                                                                                       | Accepts hold but remains a bit tense                                 | 2  |
|                 |                                                                                                                                                                                                                                                                                                                                                                                                                                                                       | Struggles to escape                                                  | -1 |
|                 |                                                                                                                                                                                                                                                                                                                                                                                                                                                                       | Hisses/growls                                                        | -2 |
|                 |                                                                                                                                                                                                                                                                                                                                                                                                                                                                       | Stiffens and extends claws                                           | -2 |
|                 |                                                                                                                                                                                                                                                                                                                                                                                                                                                                       | Swats/attempts to swat hand                                          | -3 |
| 11. Sensitivity | Sit on the ground and allow the cat to approach if he chooses. Wait at least 60 seconds before you stroke the cat along his back and gently grasp the cat's tail firmly at the base and pull up with a steady pressure just enough almost, but not quite, move his back feet off the floor. Hold for 1 second. Check all behaviors that occur.                                                                                                                        | Bites/attempts to bite hand                                          | -3 |
|                 |                                                                                                                                                                                                                                                                                                                                                                                                                                                                       | Rolls on back or rolls over                                          | 3  |
|                 |                                                                                                                                                                                                                                                                                                                                                                                                                                                                       | Shows no reaction                                                    | 3  |
|                 |                                                                                                                                                                                                                                                                                                                                                                                                                                                                       | Meows, purrs and/or chirps (circle all that apply)                   | 1  |
|                 |                                                                                                                                                                                                                                                                                                                                                                                                                                                                       | Struggles/tries to escape                                            | 0  |
|                 |                                                                                                                                                                                                                                                                                                                                                                                                                                                                       | Hisses/growls                                                        | -1 |
|                 |                                                                                                                                                                                                                                                                                                                                                                                                                                                                       | Swats/attempts to swat                                               | -2 |
|                 |                                                                                                                                                                                                                                                                                                                                                                                                                                                                       | Bites/attempts to bite                                               | -3 |

| overall score |                        |          |
|---------------|------------------------|----------|
| item #1       |                        |          |
| item #2       |                        |          |
| item #3       |                        |          |
| item #4       |                        |          |
| item #5a      |                        |          |
| item #5b      |                        |          |
| item #6       |                        |          |
| item #7       |                        |          |
| item #8       |                        |          |
| item #9       |                        |          |
| item #10      |                        |          |
| item #11      |                        |          |
|               | independent-gregarious | valiance |
| total score   |                        |          |
