# Supplementary material for: Feline-Ality™ in Real Life: A Program Evaluation
Source: MDPI journal article supplement (doi:10.3390/ani13172752), 2023-08-29
Supplement: s1 [file s1]

# meet the feline-alities

I N D E P E N D E N T - G R E G A R I O U S

**independent**

**social**

**gregarious**

# VALIANCE

**low valiance**

medium valiance

## high valiance

|    |                                                                                     |   |   |   |   |   |   |   |    |                                                                                     |    |    |    |    |    |    |    |    |                                                                                       |    |    |    |    |    |    |    |    |    |    |    |    |
|----|-------------------------------------------------------------------------------------|---|---|---|---|---|---|---|----|-------------------------------------------------------------------------------------|----|----|----|----|----|----|----|----|---------------------------------------------------------------------------------------|----|----|----|----|----|----|----|----|----|----|----|----|
|    | 2                                                                                   | 3 | 4 | 5 | 6 | 7 | 8 | 9 | 10 | 11                                                                                  | 12 | 13 | 14 | 15 | 16 | 17 | 18 | 19 | 20                                                                                    | 21 | 22 | 23 | 24 | 25 | 26 | 27 | 28 | 29 | 30 | 31 | 32 |
| 0  |    |   |   |   |   |   |   |   |    |    |    |    |    |    |    |    |    |    |    |    |    |    |    |    |    |    |    |    |    |    |    |
| 1  |                                                                                     |   |   |   |   |   |   |   |    |                                                                                     |    |    |    |    |    |    |    |    |                                                                                       |    |    |    |    |    |    |    |    |    |    |    |    |
| 2  |                                                                                     |   |   |   |   |   |   |   |    |                                                                                     |    |    |    |    |    |    |    |    |                                                                                       |    |    |    |    |    |    |    |    |    |    |    |    |
| 3  |                                                                                     |   |   |   |   |   |   |   |    |                                                                                     |    |    |    |    |    |    |    |    |                                                                                       |    |    |    |    |    |    |    |    |    |    |    |    |
| 4  |                                                                                     |   |   |   |   |   |   |   |    |                                                                                     |    |    |    |    |    |    |    |    |                                                                                       |    |    |    |    |    |    |    |    |    |    |    |    |
| 5  |                                                                                     |   |   |   |   |   |   |   |    |                                                                                     |    |    |    |    |    |    |    |    |                                                                                       |    |    |    |    |    |    |    |    |    |    |    |    |
| 6  |                                                                                     |   |   |   |   |   |   |   |    |                                                                                     |    |    |    |    |    |    |    |    |                                                                                       |    |    |    |    |    |    |    |    |    |    |    |    |
| 7  |                                                                                     |   |   |   |   |   |   |   |    |                                                                                     |    |    |    |    |    |    |    |    |                                                                                       |    |    |    |    |    |    |    |    |    |    |    |    |
| 8  |                                                                                     |   |   |   |   |   |   |   |    |                                                                                     |    |    |    |    |    |    |    |    |                                                                                       |    |    |    |    |    |    |    |    |    |    |    |    |
| 9  | <b>private investigator</b>                                                         |   |   |   |   |   |   |   |    | <b>secret admirer</b>                                                               |    |    |    |    |    |    |    |    | <b>love bug</b>                                                                       |    |    |    |    |    |    |    |    |    |    |    |    |
| 10 |                                                                                     |   |   |   |   |   |   |   |    |                                                                                     |    |    |    |    |    |    |    |    |                                                                                       |    |    |    |    |    |    |    |    |    |    |    |    |
| 11 |                                                                                     |   |   |   |   |   |   |   |    |                                                                                     |    |    |    |    |    |    |    |    |                                                                                       |    |    |    |    |    |    |    |    |    |    |    |    |
| 12 |                                                                                     |   |   |   |   |   |   |   |    |                                                                                     |    |    |    |    |    |    |    |    |                                                                                       |    |    |    |    |    |    |    |    |    |    |    |    |
| 13 |                                                                                     |   |   |   |   |   |   |   |    |                                                                                     |    |    |    |    |    |    |    |    |                                                                                       |    |    |    |    |    |    |    |    |    |    |    |    |
| 14 |  |   |   |   |   |   |   |   |    |  |    |    |    |    |    |    |    |    |  |    |    |    |    |    |    |    |    |    |    |    |    |
| 15 |                                                                                     |   |   |   |   |   |   |   |    |                                                                                     |    |    |    |    |    |    |    |    |                                                                                       |    |    |    |    |    |    |    |    |    |    |    |    |
| 16 |                                                                                     |   |   |   |   |   |   |   |    |                                                                                     |    |    |    |    |    |    |    |    |                                                                                       |    |    |    |    |    |    |    |    |    |    |    |    |
| 17 |                                                                                     |   |   |   |   |   |   |   |    |                                                                                     |    |    |    |    |    |    |    |    |                                                                                       |    |    |    |    |    |    |    |    |    |    |    |    |
| 18 |                                                                                     |   |   |   |   |   |   |   |    |                                                                                     |    |    |    |    |    |    |    |    |                                                                                       |    |    |    |    |    |    |    |    |    |    |    |    |
| 19 |                                                                                     |   |   |   |   |   |   |   |    |                                                                                     |    |    |    |    |    |    |    |    |                                                                                       |    |    |    |    |    |    |    |    |    |    |    |    |
| 20 |                                                                                     |   |   |   |   |   |   |   |    |                                                                                     |    |    |    |    |    |    |    |    |                                                                                       |    |    |    |    |    |    |    |    |    |    |    |    |
| 21 |                                                                                     |   |   |   |   |   |   |   |    |                                                                                     |    |    |    |    |    |    |    |    |                                                                                       |    |    |    |    |    |    |    |    |    |    |    |    |
| 22 |                                                                                     |   |   |   |   |   |   |   |    |                                                                                     |    |    |    |    |    |    |    |    |                                                                                       |    |    |    |    |    |    |    |    |    |    |    |    |
| 23 | <b>the executive</b>                                                                |   |   |   |   |   |   |   |    | <b>sidekick</b>                                                                     |    |    |    |    |    |    |    |    | <b>personal assistant</b>                                                             |    |    |    |    |    |    |    |    |    |    |    |    |
| 24 |                                                                                     |   |   |   |   |   |   |   |    |                                                                                     |    |    |    |    |    |    |    |    |                                                                                       |    |    |    |    |    |    |    |    |    |    |    |    |
| 25 |                                                                                     |   |   |   |   |   |   |   |    |                                                                                     |    |    |    |    |    |    |    |    |                                                                                       |    |    |    |    |    |    |    |    |    |    |    |    |
| 26 |                                                                                     |   |   |   |   |   |   |   |    |                                                                                     |    |    |    |    |    |    |    |    |                                                                                       |    |    |    |    |    |    |    |    |    |    |    |    |
| 27 |                                                                                     |   |   |   |   |   |   |   |    |                                                                                     |    |    |    |    |    |    |    |    |                                                                                       |    |    |    |    |    |    |    |    |    |    |    |    |
| 28 |                                                                                     |   |   |   |   |   |   |   |    |                                                                                     |    |    |    |    |    |    |    |    |                                                                                       |    |    |    |    |    |    |    |    |    |    |    |    |
| 29 |  |   |   |   |   |   |   |   |    |  |    |    |    |    |    |    |    |    |  |    |    |    |    |    |    |    |    |    |    |    |    |
| 30 |                                                                                     |   |   |   |   |   |   |   |    |                                                                                     |    |    |    |    |    |    |    |    |                                                                                       |    |    |    |    |    |    |    |    |    |    |    |    |
| 31 |                                                                                     |   |   |   |   |   |   |   |    |                                                                                     |    |    |    |    |    |    |    |    |                                                                                       |    |    |    |    |    |    |    |    |    |    |    |    |
| 32 |                                                                                     |   |   |   |   |   |   |   |    |                                                                                     |    |    |    |    |    |    |    |    |                                                                                       |    |    |    |    |    |    |    |    |    |    |    |    |
| 33 |                                                                                     |   |   |   |   |   |   |   |    |                                                                                     |    |    |    |    |    |    |    |    |                                                                                       |    |    |    |    |    |    |    |    |    |    |    |    |
| 34 |                                                                                     |   |   |   |   |   |   |   |    |                                                                                     |    |    |    |    |    |    |    |    |                                                                                       |    |    |    |    |    |    |    |    |    |    |    |    |
| 35 |                                                                                     |   |   |   |   |   |   |   |    |                                                                                     |    |    |    |    |    |    |    |    |                                                                                       |    |    |    |    |    |    |    |    |    |    |    |    |
| 36 |                                                                                     |   |   |   |   |   |   |   |    |                                                                                     |    |    |    |    |    |    |    |    |                                                                                       |    |    |    |    |    |    |    |    |    |    |    |    |
| 37 |                                                                                     |   |   |   |   |   |   |   |    |                                                                                     |    |    |    |    |    |    |    |    |                                                                                       |    |    |    |    |    |    |    |    |    |    |    |    |
| 38 | <b>MVP</b>                                                                          |   |   |   |   |   |   |   |    | <b>party animal</b>                                                                 |    |    |    |    |    |    |    |    | <b>leader of the band</b>                                                             |    |    |    |    |    |    |    |    |    |    |    |    |
| 39 |                                                                                     |   |   |   |   |   |   |   |    |                                                                                     |    |    |    |    |    |    |    |    |                                                                                       |    |    |    |    |    |    |    |    |    |    |    |    |
| 40 |                                                                                     |   |   |   |   |   |   |   |    |                                                                                     |    |    |    |    |    |    |    |    |                                                                                       |    |    |    |    |    |    |    |    |    |    |    |    |
| 41 |                                                                                     |   |   |   |   |   |   |   |    |                                                                                     |    |    |    |    |    |    |    |    |                                                                                       |    |    |    |    |    |    |    |    |    |    |    |    |
| 42 |                                                                                     |   |   |   |   |   |   |   |    |                                                                                     |    |    |    |    |    |    |    |    |                                                                                       |    |    |    |    |    |    |    |    |    |    |    |    |
| 43 |                                                                                     |   |   |   |   |   |   |   |    |                                                                                     |    |    |    |    |    |    |    |    |                                                                                       |    |    |    |    |    |    |    |    |    |    |    |    |
