# Supplementary material for: Feline-Ality™ in Real Life: A Program Evaluation
Source: MDPI journal article supplement (doi:10.3390/ani13172752), 2023-08-29
Supplement: s1 [file s1]

# cat adopter survey

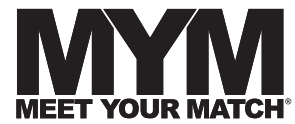

|                     |                     |        |
|---------------------|---------------------|--------|
| first name          | last name           | date   |
| address             |                     | apt. # |
| city                | state               | zip    |
| home phone (      ) | work phone (      ) | email  |

|   |                                                                                    |                                                             |                          |                  |                                        |
|---|------------------------------------------------------------------------------------|-------------------------------------------------------------|--------------------------|------------------|----------------------------------------|
| 1 | I would consider my household to be like                                           | A library                                                   | Middle of the road       | A carnival       |                                        |
| 2 | I am comfortable with a cat that likes to play "chase my ankles" and similar games | No                                                          | Somewhat                 | Yes              |                                        |
| 3 | I want my cat to interact with guests that come to my house                        | Little of the time                                          | Some of the time         | All of the time  |                                        |
| 4 | How do you feel about a boisterous cat that gets into everything?                  | Love them but rather not to live with them                  | Depends on the situation | Fine by me       |                                        |
| 5 | My cat needs to be able to adjust to new situations quickly                        | Not important                                               | Somewhat                 | Yes              |                                        |
| 6 | I want my cat to love being with children in my home                               | It's not important whether my cat loves being with children | Some of the time         | Most of the time | Children do not often come to my house |

|   |                                                                |                           |                      |                           |  |
|---|----------------------------------------------------------------|---------------------------|----------------------|---------------------------|--|
| 7 | My cat needs to be able to be alone                            | More than 9 hours per day | 4 to 8 hours per day | Less than 4 hours per day |  |
| 8 | When I am at home, I want my cat to be by my side or in my lap | Little of the time        | Some of the time     | All of the time           |  |
| 9 | I want my cat to enjoy being held                              | Little of the time        | Some of the time     | Most of the time          |  |

|    |                                                         |                        |                    |                   |                                           |
|----|---------------------------------------------------------|------------------------|--------------------|-------------------|-------------------------------------------|
| 10 | I need my cat to get along with (circle all that apply) |                        |                    |                   | Dogs   Cats<br>Birds   Other              |
| 11 | My cat will be                                          | Inside                 | Inside and Outside | Outside           |                                           |
| 12 | I have lived with cats before                           | No                     |                    | Yes<br>Date _____ | Currently                                 |
| 13 | I prefer my cat to be talkative                         | No                     |                    | Yes               | It's not important if my cat is talkative |
| 14 | I want my cat to play with toys                         | Little of the time     | Sometimes          | Often             |                                           |
| 15 | I want my cat to be active                              | Not very active at all | Somewhat           | Yes, very         |                                           |

|    |                                                                     |
|----|---------------------------------------------------------------------|
| 16 | It is most important to me that my cat _____<br>(fill in the blank) |
|----|---------------------------------------------------------------------|

|                                |                                                           |
|--------------------------------|-----------------------------------------------------------|
| <b>FOR OFFICE<br/>USE ONLY</b> | <b>RECOMMENDED COLOR MATCH:   PURPLE   ORANGE   GREEN</b> |
|                                | <b>RECOMMENDED FELINE-ALITY™(IES) _____</b>               |
